# Supplementary material for: The Seasonal Variation in Bioactive Compounds Content in Juice from Organic and Non-organic Tomatoes
Source: PubMed Central journal article supplement (PMC3659276; doi:10.1007/s11130-013-0352-2), 2013-04-23
Supplement: 11130_2013_352_MOESM1_ESM.pdf [file 11130_2013_352_MOESM1_ESM.pdf]

Tab 1. Characteristic of localization, fertilizers regime and plant protection used for organic and conventional cultivation of tomatoes (average value for 2008-2009)

| Farm                  | Localization                             | Type of soil                                                                  | Fertilizers                                                                                                               | Plant protection system                                                 | fertilization range (kg ha <sup>-1</sup> ) |     |     |    |     |                |
|-----------------------|------------------------------------------|-------------------------------------------------------------------------------|---------------------------------------------------------------------------------------------------------------------------|-------------------------------------------------------------------------|--------------------------------------------|-----|-----|----|-----|----------------|
|                       |                                          |                                                                               |                                                                                                                           |                                                                         | N                                          | P   | K   | Mg | Ca  | Micro elements |
| organic farm no.1     | Kaszewska Wola<br>/51°30' N<br>20°55' E/ | sandy- loamy, middle soil III category<br>40% (floatable particles)<br>pH 7.2 | green manure (50t ha <sup>-1</sup> ), Patentkali (P:S 30:10) basaltic flour, Humobak (mixture of bacteria and soil fungi) | Bioczos BR (garlic ekstrakt), Antifung 20 SL                            | 140                                        | 30  | 205 | 90 | 130 | yes            |
| organic farm no.2     | Radzanów<br>/51°56' N<br>20°05' E/       | sandy- loamy, slight soil II category<br>35% (floatable particles)<br>pH 7.1  | compost 60%, Biohumus                                                                                                     | Grevit 200 SL                                                           | 180                                        | 60  | 140 | 90 | 160 | yes            |
| non-organic farm no.1 | Kaszewska Wola<br>/51°19' N<br>20°58' E/ | sandy-clay, slight soil II category<br>20% (floatable particles)<br>pH 7.0    | cow manure (15t ha <sup>-1</sup> ), organic chalk, calcium and magnesium nitrate                                          | Sumilex 500 SC                                                          | 220                                        | 100 | 170 | 60 | 220 | no             |
| non-organic farm no.2 | Sewerynow<br>/51°28' N<br>20°54' E/      | sandy- loamy, slight soil II category<br>15% (floatable particles)<br>pH 6.9  | Polidap (N:P:S 18:46:5), Grandar (N:P:K 3:9:19)., Nitrofosfate                                                            | Mospilan 20 SP (acetamipiryde) Betoksan S 050 SL (2-naftoxyacetic acid) | 300                                        | 210 | 140 | 35 | 480 | yes            |
