# Supplementary material for: The Seasonal Variation in Bioactive Compounds Content in Juice from Organic and Non-organic Tomatoes
Source: PubMed Central journal article supplement (PMC3659276; doi:10.1007/s11130-013-0352-2), 2013-04-23
Supplement: 11130_2013_352_MOESM3_ESM.pdf [file 11130_2013_352_MOESM3_ESM.pdf]

Tab. 3. The content of total phenolic acids and individual phenolic acids (mg/100 g fw) in organic and conventional produced tomatoes juice in two years of experiment (average value  $\pm$  standard deviation)

| <b>2008</b>                 | total phenolic acids | gallic acid         | chlorogenic acid  | p-coumaric acid    |
|-----------------------------|----------------------|---------------------|-------------------|--------------------|
| Org.1                       | 47.56 $\pm$ 2.53     | 45.54 $\pm$ 2.41    | 1.91 $\pm$ 0.12   | 0.117 $\pm$ 0.01   |
| Org.2                       | 30.21 $\pm$ 2.43     | 28.49 $\pm$ 2.34    | 1.58 $\pm$ 0.09   | 0.145 $\pm$ 0.01   |
| Org.3                       | 33.63 $\pm$ 4.01     | 31.74 $\pm$ 3.38    | 1.69 $\pm$ 0.18   | 0.208 $\pm$ 0.01   |
| Org.4                       | 66.04 $\pm$ 1.93     | 64.86 $\pm$ 1.92    | 1.07 $\pm$ 0.01   | 0.107 $\pm$ 0.02   |
| Org.5                       | 79.28 $\pm$ 1.35     | 75.40 $\pm$ 1.34    | 3.77 $\pm$ 0.02   | 0.108 $\pm$ 0.02   |
| Org.6                       | 68.27 $\pm$ 1.87     | 66.11 $\pm$ 1.81    | 2.03 $\pm$ 0.01   | 0.138 $\pm$ 0.01   |
|                             |                      |                     |                   |                    |
| Non-org.1                   | 41.26 $\pm$ 0.81     | 40.39 $\pm$ 0.80    | 0.77 $\pm$ 0.01   | 0.102 $\pm$ 0.01   |
| Non-org.2                   | 70.86 $\pm$ 1.34     | 69.66 $\pm$ 1.42    | 1.09 $\pm$ 0.01   | 0.118 $\pm$ 0.07   |
| Non-org.3                   | 24.60 $\pm$ 0.11     | 23.39 $\pm$ 0.11    | 1.10 $\pm$ 0.01   | 0.110 $\pm$ 0.01   |
| Non-org.4                   | 56.91 $\pm$ 0.35     | 55.69 $\pm$ 0.36    | 1.06 $\pm$ 0.01   | 0.159 $\pm$ 0.01   |
| Non-org.5                   | 40.97 $\pm$ 0.16     | 38.06 $\pm$ 0.14    | 2.72 $\pm$ 0.02   | 0.190 $\pm$ 0.02   |
| Non-org.6                   | 42.02 $\pm$ 0.22     | 40.64 $\pm$ 0.20    | 1.26 $\pm$ 0.02   | 0.118 $\pm$ 0.01   |
| <b>2009</b>                 |                      |                     |                   |                    |
| Org.1                       | 49.30 $\pm$ 3.01     | 46.07 $\pm$ 2.96    | 3.10 $\pm$ 0.10   | 0.130 $\pm$ 0.01   |
| Org.2                       | 38.21 $\pm$ 0.80     | 34.52 $\pm$ 0.80    | 3.55 $\pm$ 0.17   | 0.136 $\pm$ 0.01   |
| Org.3                       | 40.94 $\pm$ 3.68     | 37.21 $\pm$ 3.59    | 3.59 $\pm$ 0.27   | 0.142 $\pm$ 0.02   |
| Org.4                       | 68.41 $\pm$ 1.37     | 66.24 $\pm$ 1.36    | 2.04 $\pm$ 0.04   | 0.141 $\pm$ 0.01   |
| Org.5                       | 53.87 $\pm$ 0.52     | 50.72 $\pm$ 0.49    | 3.04 $\pm$ 0.03   | 0.105 $\pm$ 0.01   |
| Org.6                       | 45.14 $\pm$ 1.06     | 42.51 $\pm$ 1.01    | 2.51 $\pm$ 0.05   | 0.124 $\pm$ 0.01   |
|                             |                      |                     |                   |                    |
| Non-org.1                   | 62.51 $\pm$ 1.14     | 59.77 $\pm$ 1.13    | 2.63 $\pm$ 0.02   | 0.117 $\pm$ 0.01   |
| Non-org.2                   | 53.70 $\pm$ 0.33     | 51.69 $\pm$ 0.29    | 1.88 $\pm$ 0.01   | 0.129 $\pm$ 0.04   |
| Non-org.3                   | 29.63 $\pm$ 0.89     | 26.71 $\pm$ 0.87    | 2.82 $\pm$ 0.09   | 0.103 $\pm$ 0.01   |
| Non-org.4                   | 58.34 $\pm$ 0.15     | 55.51 $\pm$ 0.22    | 2.70 $\pm$ 0.12   | 0.130 $\pm$ 0.02   |
| Non-org.5                   | 31.40 $\pm$ 5.06     | 28.60 $\pm$ 5.07    | 2.68 $\pm$ 0.01   | 0.127 $\pm$ 0.01   |
| Non-org.6                   | 31.94 $\pm$ 9.44     | 29.31 $\pm$ 9.45    | 2.51 $\pm$ 0.08   | 0.119 $\pm$ 0.01   |
|                             |                      |                     |                   |                    |
| mean Org. juices            | 51.74 $\pm$ 15.11 a  | 49.12 $\pm$ 15.08 a | 2.49 $\pm$ 0.87 b | 0.134 $\pm$ 0.03 a |
| mean Non-org. juices        | 45.35 $\pm$ 14.54 a  | 43.29 $\pm$ 14.68 a | 1.93 $\pm$ 0.78 a | 0.127 $\pm$ 0.04 a |
| mean tomatoes juices (2008) | 50.14 $\pm$ 17.09 A  | 48.33 $\pm$ 16.82 A | 1.67 $\pm$ 0.82 A | 0.135 $\pm$ 0.04 A |
| mean tomatoes juices(2009)  | 46.95 $\pm$ 12.77 A  | 44.07 $\pm$ 12.96 A | 2.75 $\pm$ 0.51 B | 0.125 $\pm$ 0.02 A |
|                             |                      |                     |                   |                    |
| <b>p-value</b>              |                      |                     |                   |                    |
| production system           | n.s.**               | n.s.                | 0.0005            | n.s.               |
| year                        | n.s.                 | n.s.                | <0.0001           | n.s.               |
| production x year           | n.s.                 | n.s.                | n.s.              | n.s.               |

\* means in a columns followed by the different letter are significantly different at the 5% level of probability ( $\alpha=0.05$ ) by Tukey's test; \*\* not significant statistically ( $\alpha>0.05$ )  
small letter focused differences between juice production system, CAPITAL letter focused differences between experimental years
