# Supplementary material for: The Seasonal Variation in Bioactive Compounds Content in Juice from Organic and Non-organic Tomatoes
Source: PubMed Central journal article supplement (PMC3659276; doi:10.1007/s11130-013-0352-2), 2013-04-23
Supplement: 11130_2013_352_MOESM4_ESM.pdf [file 11130_2013_352_MOESM4_ESM.pdf]

Tab.4. The content of total flavonoids and individual flavonoids (mg/100 g fw) in organic and conventional produced tomatoes juice in two years of experiment (average value  $\pm$  standard deviation)

| <b>2008</b>                 | total flavonoids  | quercetin-3-O-rutinoside | quercetin-3-O-glucoside | quercetin         | kaempferol        |
|-----------------------------|-------------------|--------------------------|-------------------------|-------------------|-------------------|
| Org.1                       | 1.98 $\pm$ 0.04   | 0.46 $\pm$ 0.02          | 0.21 $\pm$ 0.01         | 0.67 $\pm$ 0.02   | 0.64 $\pm$ 0.04   |
| Org.2                       | 2.21 $\pm$ 0.15   | 0.56 $\pm$ 0.03          | 0.23 $\pm$ 0.01         | 0.75 $\pm$ 0.02   | 0.68 $\pm$ 0.14   |
| Org.3                       | 2.41 $\pm$ 0.06   | 0.64 $\pm$ 0.01          | 0.22 $\pm$ 0.01         | 0.80 $\pm$ 0.03   | 0.75 $\pm$ 0.07   |
| Org.4                       | 2.10 $\pm$ 0.05   | 0.52 $\pm$ 0.01          | 0.11 $\pm$ 0.01         | 0.92 $\pm$ 0.03   | 0.55 $\pm$ 0.01   |
| Org.5                       | 2.07 $\pm$ 0.11   | 0.77 $\pm$ 0.01          | 0.13 $\pm$ 0.01         | 0.79 $\pm$ 0.04   | 0.39 $\pm$ 0.03   |
| Org.6                       | 1.40 $\pm$ 0.10   | 0.26 $\pm$ 0.02          | 0.11 $\pm$ 0.01         | 0.57 $\pm$ 0.09   | 0.46 $\pm$ 0.01   |
|                             |                   |                          |                         |                   |                   |
| Non-org.1                   | 1.19 $\pm$ 0.03   | 0.18 $\pm$ 0.01          | 0.07 $\pm$ 0.01         | 0.46 $\pm$ 0.01   | 0.48 $\pm$ 0.02   |
| Non-org.2                   | 1.61 $\pm$ 0.02   | 0.33 $\pm$ 0.01          | 0.14 $\pm$ 0.01         | 0.69 $\pm$ 0.01   | 0.46 $\pm$ 0.02   |
| Non-org.3                   | 1.18 $\pm$ 0.01   | 0.15 $\pm$ 0.02          | 0.05 $\pm$ 0.01         | 0.44 $\pm$ 0.02   | 0.54 $\pm$ 0.01   |
| Non-org.4                   | 1.85 $\pm$ 0.02   | 0.53 $\pm$ 0.01          | 0.12 $\pm$ 0.01         | 0.62 $\pm$ 0.01   | 0.57 $\pm$ 0.01   |
| Non-org.5                   | 1.86 $\pm$ 0.02   | 0.57 $\pm$ 0.01          | 0.12 $\pm$ 0.01         | 0.50 $\pm$ 0.01   | 0.67 $\pm$ 0.01   |
| Non-org.6                   | 1.43 $\pm$ 0.01   | 0.23 $\pm$ 0.01          | 0.11 $\pm$ 0.02         | 0.58 $\pm$ 0.01   | 0.51 $\pm$ 0.02   |
|                             |                   |                          |                         |                   |                   |
| <b>2009</b>                 |                   |                          |                         |                   |                   |
| Org.1                       | 3.06 $\pm$ 0.15   | 1.24 $\pm$ 0.02          | 0.32 $\pm$ 0.02         | 1.28 $\pm$ 0.02   | 0.22 $\pm$ 0.02   |
| Org.2                       | 3.69 $\pm$ 0.18   | 1.78 $\pm$ 0.07          | 0.32 $\pm$ 0.01         | 1.35 $\pm$ 0.04   | 0.22 $\pm$ 0.01   |
| Org.3                       | 3.63 $\pm$ 0.23   | 1.83 $\pm$ 0.11          | 0.37 $\pm$ 0.06         | 1.19 $\pm$ 0.03   | 0.24 $\pm$ 0.02   |
| Org.4                       | 2.99 $\pm$ 0.03   | 1.62 $\pm$ 0.08          | 0.22 $\pm$ 0.02         | 0.99 $\pm$ 0.01   | 0.16 $\pm$ 0.01   |
| Org.5                       | 3.91 $\pm$ 0.07   | 1.55 $\pm$ 0.01          | 0.62 $\pm$ 0.01         | 1.38 $\pm$ 0.01   | 0.36 $\pm$ 0.01   |
| Org.6                       | 4.27 $\pm$ 0.11   | 1.69 $\pm$ 0.04          | 0.60 $\pm$ 0.01         | 1.59 $\pm$ 0.01   | 0.38 $\pm$ 0.01   |
|                             |                   |                          |                         |                   |                   |
| Non-org.1                   | 3.37 $\pm$ 0.02   | 1.47 $\pm$ 0.01          | 0.31 $\pm$ 0.01         | 1.29 $\pm$ 0.01   | 0.30 $\pm$ 0.01   |
| Non-org.2                   | 3.33 $\pm$ 0.02   | 1.57 $\pm$ 0.01          | 0.35 $\pm$ 0.01         | 1.18 $\pm$ 0.01   | 0.24 $\pm$ 0.01   |
| Non-org.3                   | 3.30 $\pm$ 0.04   | 1.63 $\pm$ 0.03          | 0.28 $\pm$ 0.01         | 1.15 $\pm$ 0.02   | 0.23 $\pm$ 0.01   |
| Non-org.4                   | 2.83 $\pm$ 0.37   | 1.37 $\pm$ 0.41          | 0.26 $\pm$ 0.02         | 0.98 $\pm$ 0.1    | 0.22 $\pm$ 0.02   |
| Non-org.5                   | 4.33 $\pm$ 0.34   | 1.62 $\pm$ 0.38          | 0.80 $\pm$ 0.02         | 1.57 $\pm$ 0.01   | 0.35 $\pm$ 0.01   |
| Non-org.6                   | 4.52 $\pm$ 0.14   | 1.82 $\pm$ 0.10          | 0.63 $\pm$ 0.01         | 1.34 $\pm$ 0.03   | 0.72 $\pm$ 0.02   |
|                             |                   |                          |                         |                   |                   |
| mean Org. juices            | 2.81 $\pm$ 0.88 a | 1.08 $\pm$ 0.27 b        | 0.29 $\pm$ 0.17 a       | 1.02 $\pm$ 0.02 b | 0.42 $\pm$ 0.20 a |
| mean Non-org. juices        | 2.57 $\pm$ 1.16 a | 0.96 $\pm$ 0.16 a        | 0.27 $\pm$ 0.22 a       | 0.90 $\pm$ 0.08 a | 0.44 $\pm$ 0.17 a |
| mean tomatoes juices (2008) | 1.77 $\pm$ 0.39 A | 0.43 $\pm$ 0.09 A        | 0.13 $\pm$ 0.05 A       | 0.65 $\pm$ 0.05 A | 0.56 $\pm$ 0.12 B |
| mean tomatoes juices (2009) | 3.60 $\pm$ 0.56 B | 1.60 $\pm$ 0.24 B        | 0.42 $\pm$ 0.18 B       | 1.28 $\pm$ 0.09 B | 0.30 $\pm$ 0.14 A |
|                             |                   |                          |                         |                   |                   |
| <b>p-value</b>              |                   |                          |                         |                   |                   |
| production system           | n.s. **           | 0.0171                   | n.s.                    | 0.014             | n.s.              |
| year                        | <0.0001           | <0.0001                  | <0.0001                 | <0.0001           | <0.0001           |
| production x year           | n.s.              | n.s.                     | n.s.                    | 0.043             | n.s.              |

\* means in a columns followed by the different letter are significantly different at the 5% level of probability ( $\alpha=0.05$ ) by Tukey's test; \*\* not significant statistically ( $\alpha>0.05$ ) small letter focused differences between juice production system, CAPITAL letter focused differences between experimental years
